# Supplementary material for: Dietary Salt Administration Decreases Enterotoxigenic Bacteroides fragilis (ETBF)-Promoted Tumorigenesis via Inhibition of Colonic Inflammation
Source: MDPI journal article supplement (doi:10.3390/ijms21218034), 2020-10-28
Supplement: s1 [file s1]

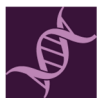

Supplementary materials

# Dietary Salt Administration Decreases Enterotoxigenic *Bacteroides fragilis* (ETBF)-Promoted Tumorigenesis via Inhibition of Colonic Inflammation

Soonjae Hwang <sup>1,2</sup>, Hye Chin Yi <sup>1</sup>, Samnoh Hwang <sup>1</sup>, Minjeong Jo <sup>1</sup>, and Ki-Jong Rhee <sup>1,\*</sup>

<sup>1</sup> Department of Biomedical Laboratory Science, College of Health Sciences, Yonsei University MIRAE Campus, Wonju, Gangwon-do 26493, Korea; soonjae@kist.re.kr (S.H.); wls7551@hanmail.net (H.C.Y.); tkash3@naver.com (S.H.); minjeongjo@yonsei.ac.kr (M.J.)

<sup>2</sup> Natural Product Informatics Research Center, Korea Institute of Science and Technology, Gangneung, Gangwon-do 25451, Korea

\* Correspondence: kjrhee@yonsei.ac.kr; Tel.: +82-33-760-2445; fax: +82-33-760-2195

Received: 31 August 2020; Accepted: 27 October 2020; Published: 28 October 2020

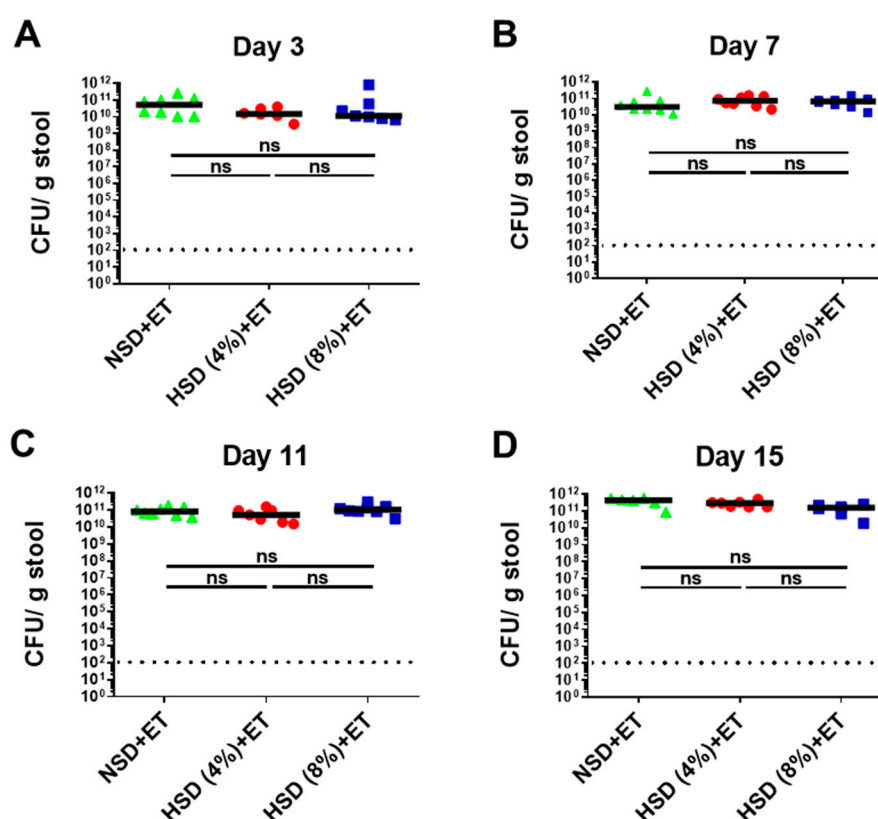

**Figure S1.** High-salt diet does not impact ETBF colonization in mice. WT-ETBF colonization was assessed by stool plating. C57BL/6 female mice were inoculated with WT-ETBF ( $\sim 1 \times 10^9$  CFU). HSD (4% and 8%) treated groups were given chow containing either 4% NaCl or 8% NaCl, respectively. NSD, normal salt diet; HSD, high salt diet; ET, ETBF. Significance between treated groups were determined using Mann–Whitney *U* test. \*  $p < 0.05$ . ns, no statistical significance.

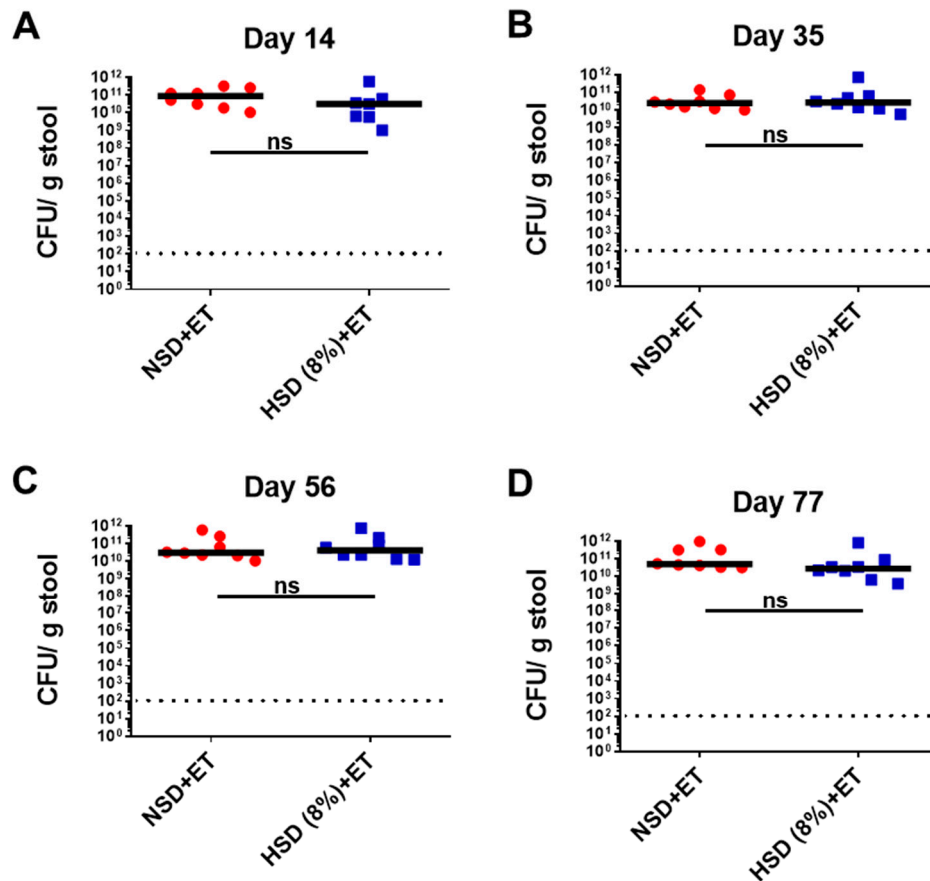

**Figure S2.** High salt diet does not impact ETBF colonization in AOM/DSS-treated mice. WT-ETBF colonization was assessed by stool plating. AOM/DSS-treated C57BL/6 female mice were inoculated with WT-ETBF ( $\sim 1 \times 10^9$  CFU). HSD (8%) treated groups were given chow containing either 8% NaCl, respectively. NSD, normal salt diet; HSD, high salt diet; ET, ETBF. NSD+ET vs. HSD (8%) + ET. Significance between treated groups were determined using Mann-Whitney *U* test. ns, no statistical significance.
